# Supplementary material
Source: PubMed Central journal article supplement (PMC3070594)
Supplement: mmc3.pdf [file mmc3.pdf]

# Supplementary Figure 3

Tumor: Gly Ser Leu Val Pro Ile **Ala** His Leu Trp  
321 CCTTTGCTTGTCCCGATAG**C**TCACCTTTGG 350  
|||||  
Exon2 CCTTTGCTTGTCCCGATAG**T**TCACCTTTGG  
Normal: Gly Ser Leu Val Pro Ile **Gly** His Leu Trp

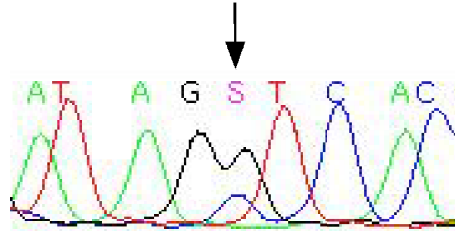

Tumor: c.341G>C → p.Gly114Ala
